# Supplementary material
Source: PubMed Central journal article supplement (PMC10248815)
Supplement: jamasurg-e231772-s001.pdf [file jamasurg-e231772-s001.pdf]

## Supplemental Online Content

Kuemmel S, Heil J, Bruzas S, et al. Safety of targeted axillary dissection after neoadjuvant therapy in patients with node-positive breast cancer. *JAMA Surg*. Published online June 7, 2023. doi:10.1001/jamasurg.2023.1772

**eTable 1.** Abbreviations and the Corresponding Expanded Form

**eTable 2.** Baseline Characteristics of All Patients (n = 473) Who Received NST Prior to Surgery, 274 of 473 Patients Who Did Not Undergo TAD, and 199 of 473 Patients Who Underwent Successful TAD

**eTable 3.** Multivariate Cox Regression Analysis for Invasive Disease-Free Survival

**eTable 4.** Multivariate Cox Regression Analysis for Overall Survival

**eTable 5.** Multivariate Cox Regression Analysis for Distant Disease-Free Survival

**eTable 6.** Multivariate Cox Regression Analysis for Breast Cancer-Specific Survival

**eFigure.** Kaplan-Meier Curves for Distant Disease-Free Survival, Breast Cancer-Specific Survival, and Locoregional Recurrence

This supplementary material has been provided by the authors to give readers additional information about their work.

**eTable 1.** Abbreviations and the Corresponding Expanded Form

| <b>Abbreviation</b> | <b>Expanded Form</b>                                                 |
|---------------------|----------------------------------------------------------------------|
| ALND                | axillary lymph node dissection                                       |
| aRFI                | axillary recurrence-free interval                                    |
| ART                 | axillary radiotherapy                                                |
| BCSS                | breast cancer-specific survival                                      |
| cN+                 | clinically node-positive                                             |
| CI                  | confidence interval                                                  |
| <i>ERBB2</i>        | human epidermal growth factor receptor 2 (formerly <i>HER2</i> )     |
| <i>ERBB2+</i>       | <i>ERBB2</i> positive                                                |
| HR                  | hazard ratio                                                         |
| HR–                 | hormone receptor negative                                            |
| HR+                 | hormone receptor positive                                            |
| DFS                 | disease-free survival                                                |
| LN                  | lymph node                                                           |
| MARI                | Marking Axillary lymph nodes with Radioactive Iodine seeds           |
| NST                 | neoadjuvant systemic therapy                                         |
| OS                  | overall survival                                                     |
| pCR                 | pathologic complete response                                         |
| SD                  | standard deviation                                                   |
| SLN                 | sentinel lymph node                                                  |
| SLNB                | sentinel lymph node biopsy                                           |
| TAD                 | targeted axillary dissection                                         |
| TLN                 | target lymph node                                                    |
| TLNB                | target lymph node biopsy                                             |
| TNBC                | triple-negative breast cancer                                        |
| ycN0                | clinically node negative after neoadjuvant systemic therapy          |
| ycN+                | clinically node positive after neoadjuvant systemic therapy          |
| ypN0                | histopathologically node negative after neoadjuvant systemic therapy |
| ypN+                | histopathologically node positive after neoadjuvant systemic therapy |
| ypT0/Tis            | pCR in the breast after neoadjuvant systemic therapy                 |

**eTable 2.** Baseline Characteristics of All Patients (n = 473) Who Received NST Prior to Surgery, 274 of 473 Patients Who Did Not Undergo TAD, and 199 of 473 Patients Who Underwent Successful TAD

| Variable                                         |                | All patients | No TAD      | Successful TAD | P value |
|--------------------------------------------------|----------------|--------------|-------------|----------------|---------|
|                                                  |                | No. (%)      | No. (%)     | No. (%)        |         |
| Patients                                         |                | 473 (100)    | 274 (100)   | 199 (100)      |         |
| Age (years)                                      | median (range) | 53 (25–82)   | 54 (25–61)  | 52 (26–82)     | .176    |
| ALND                                             | yes            | 320 (67.7)   | 240 (87.6)  | 80 (40.2)      | < .001  |
|                                                  | no             | 153 (32.3)   | 34 (12.4)   | 119 (59.8)     |         |
| Tumor receptor subtype                           | HR+/ERBB2+     | 93 (19.7)    | 54 (19.7)   | 39 (19.6)      | .971    |
|                                                  | HR+/ERBB2–     | 205 (43.3)   | 118 (43.1)  | 87 (43.7)      |         |
|                                                  | HR–/ERBB2+     | 66 (14.0)    | 37 (13.5)   | 29 (14.6)      |         |
|                                                  | HR–/ERBB2–     | 109 (23.0)   | 65 (23.7)   | 44 (22.1)      |         |
| Clinical tumor size at diagnosis (mm)            | mean (SD)      | 28.5 (16.6)  | 29.9 (18.2) | 26.6 (13.9)    | .063    |
|                                                  | median (range) | 2 (1–15)     | 2 (1–15)    | 1 (1–9)        | < .001  |
| No. of suspicious LNs on ultrasound at diagnosis | 1              | 224 (47.4)   | 110 (40.1)  | 114 (57.3)     | < .001  |
|                                                  | 2              | 113 (23.9)   | 66 (24.1)   | 47 (23.6)      |         |
|                                                  | ≥ 3            | 136 (28.8)   | 98 (35.8)   | 38 (19.1)      |         |
| Clinical nodal status after NST                  | ycN0           | 332 (70.2)   | 180 (66.0)  | 152 (76.4)     | .014    |
|                                                  | ycN+           | 141 (29.8)   | 94 (34.0)   | 47 (23.6)      |         |
| Pathological nodal status after NST              | ypN0           | 285 (60.3)   | 159 (58.0)  | 126 (63.3)     | .255    |
|                                                  | ypN+           | 188 (39.7)   | 115 (42.0)  | 73 (36.7)      |         |

Abbreviations: ALND, axillary lymph node dissection; ERBB2, human epidermal growth factor receptor 2; HR–, hormone receptor negative; HR+, hormone receptor positive; LN, lymph node; NST, neoadjuvant systemic therapy; SD, standard deviation; TAD, targeted axillary dissection; ycN0/+, clinically node negative/positive after NST; ypN0/+, pathologically node negative/positive after NST.

**eTable 3.** Multivariate Cox Regression Analysis for Invasive Disease-Free Survival

|                                                     | Total      | Events<br>N (%) | Multivariate Analysis <sup>a</sup> |                  |
|-----------------------------------------------------|------------|-----------------|------------------------------------|------------------|
|                                                     |            |                 | HR (95% CI)                        | P                |
| Number                                              | 199        | 28 (14.1)       |                                    |                  |
| Axillary surgery                                    |            |                 |                                    |                  |
| TAD + ALND                                          | 80 (40.2)  | 16 (20.0)       | 1 [Reference]                      |                  |
| TAD                                                 | 119 (59.8) | 12 (10.1)       | 0.40 (0.10–1.65)                   | 0.203            |
| Age per Year                                        |            |                 | 1.05 (1.01–1.08)                   | <b>0.008</b>     |
| Tumor receptor subtype                              |            |                 |                                    |                  |
| HR+/ERBB2+                                          | 39 (19.6)  | 3 (7.7)         | 1 [Reference]                      |                  |
| HR+/ERBB2–                                          | 87 (43.7)  | 14 (16.1)       | 0.28 (0.06–1.30)                   | 0.104            |
| HR–/ERBB2+                                          | 29 (14.6)  | 3 (10.3)        | 0.68 (0.21–4.01)                   | 0.675            |
| HR–/ERBB2–                                          | 44 (22.1)  | 8 (18.2)        | 0.85 (0.20–3.65)                   | 0.832            |
| Clinical tumor size at diagnosis<br>(per mm)        |            |                 | 1.03 (1.00–1.05)                   | <b>0.033</b>     |
| No. of suspicious LNs on<br>ultrasound at diagnosis |            |                 |                                    |                  |
| 1                                                   | 114 (57.3) | 11 (9.6)        | 1 [Reference]                      |                  |
| 2                                                   | 47 (23.6)  | 9 (19.1)        | 2.19 (0.81–5.91)                   | 0.122            |
| ≥ 3                                                 | 38 (19.1)  | 8 (21.1)        | 4.38 (1.48–12.9)                   | <b>0.008</b>     |
| Clinical nodal status after NST                     |            |                 |                                    |                  |
| ycN0                                                | 152 (76.4) | 19 (12.5)       | 1 [Reference]                      |                  |
| ycN+                                                | 47 (23.6)  | 9 (19.1)        | 1.67 (0.63–4.44)                   | 0.304            |
| Pathological nodal status after NST                 |            |                 |                                    |                  |
| ypN0                                                | 126 (63.3) | 12 (9.5)        | 1 [Reference]                      |                  |
| ypN+                                                | 73 (36.7)  | 16 (21.9)       | 2.48 (0.72–8.60)                   | 0.151            |
| No. of all resected LNs (per LN)                    |            |                 | 0.97 (0.87–1.07)                   | 0.539            |
| No. of TAD LNs (per LN)                             |            |                 | 0.78 (0.58–1.04)                   | 0.095            |
| Pathological tumor status after NST                 |            |                 |                                    |                  |
| ypT0                                                | 145 (72.9) | 13 (9.0)        | 1 [Reference]                      |                  |
| ypT1–4                                              | 50 (25.1)  | 15 (30.0)       | 5.70 (2.10–14.4)                   | <b>&lt;0.001</b> |
| ypTx                                                | 4 (2.0)    | 0               | -                                  |                  |
| Radiotherapy                                        |            |                 |                                    |                  |
| No                                                  | 12 (6.0)   | 3 (25.0)        | 1 [Reference]                      |                  |
| Yes                                                 | 180 (90.5) | 24 (13.3)       | 0.13 (0.03–0.53)                   | <b>0.005</b>     |
| Unknown                                             | 7 (3.5)    | 1 (14.3)        | 0.61 (0.04–9.82)                   | 0.727            |
| Post-neoadjuvant Chemotherapy                       |            |                 |                                    |                  |
| No                                                  | 176 (88.4) | 27 (15.3)       | 1 [Reference]                      |                  |
| Yes                                                 | 17 (8.5)   | 1 (5.9)         | 0.37 (0.04–3.12)                   | 0.362            |
| Unknown                                             | 6 (3.0)    | 0               | -                                  |                  |

Abbreviations: ALND, axillary lymph node dissection; CI, confidence interval; ERBB2, human epidermal growth factor receptor 2; HR, hazard ratio; HR+, hormone receptor positive; HR–, hormone receptor negative; LN, lymph node; NST, neoadjuvant systemic therapy; TAD, targeted axillary dissection; T, tumor; ycN0/+, clinically node negative/positive after NST; ypN0/+, pathologically node negative/positive after NST.

<sup>a</sup> The number of positive lymph nodes had a high intercorrelation with ypN and was therefore excluded from the model. Likewise, endocrine and antibody therapy had a high correlation with tumor receptor subtype and were not included in the model. Statistically significant *P* values are indicated in bold.

**eTable 4.** Multivariate Cox Regression Analysis for Overall Survival

|                                                     | Total      | Events<br>N (%) | Multivariate Analysis <sup>a</sup> |              |
|-----------------------------------------------------|------------|-----------------|------------------------------------|--------------|
|                                                     |            |                 | HR (95% CI)                        | <i>P</i>     |
| Number                                              | 199        | 15 (7.5)        |                                    |              |
| Axillary surgery                                    |            |                 |                                    |              |
| TAD + ALND                                          | 80 (40.2)  | 8 (10.0)        | 1 [Reference]                      |              |
| TAD                                                 | 119 (59.8) | 7 (5.9)         | 0.68 (0.09–4.85)                   | 0.698        |
| Age per Year                                        |            |                 | 1.05 (1.00–1.11)                   | <b>0.050</b> |
| Tumor receptor subtype                              |            |                 |                                    |              |
| HR+/ <i>ERBB2</i> +                                 | 39 (19.6)  | 2 (5.1)         | 1 [Reference]                      |              |
| HR+/ <i>ERBB2</i> –                                 | 87 (43.7)  | 7 (8.0)         | 0.31 (0.04–2.13)                   | 0.231        |
| HR–/ <i>ERBB2</i> +                                 | 29 (14.6)  | 0               | -                                  |              |
| HR–/ <i>ERBB2</i> –                                 | 44 (22.1)  | 6 (13.6)        | 2.75 (0.49–15.5)                   | 0.252        |
| Clinical tumor size at diagnosis<br>(per mm)        |            |                 | 1.01 (0.96–1.06)                   | 0.728        |
| No. of suspicious LNs on<br>ultrasound at diagnosis |            |                 |                                    |              |
| 1                                                   | 114 (57.3) | 9 (7.9)         | 1 [Reference]                      |              |
| 2                                                   | 47 (23.6)  | 3 (6.4)         | 0.80 (0.18–3.42)                   | 0.758        |
| ≥ 3                                                 | 38 (19.1)  | 3 (7.9)         | 0.98 (0.19–5.01)                   | 0.979        |
| Clinical nodal status after NST                     |            |                 |                                    |              |
| ycN0                                                | 152 (76.4) | 7 (4.6)         | 1 [Reference]                      |              |
| ycN+                                                | 47 (23.6)  | 8 (17.0)        | 2.95 (0.92–9.43)                   | 0.069        |
| Pathological nodal status after NST                 |            |                 |                                    |              |
| ypN0                                                | 126 (63.3) | 6 (4.8)         | 1 [Reference]                      |              |
| ≥ ypN1                                              | 73 (36.7)  | 9 (12.3)        | 3.12 (0.64–15.2)                   | 0.158        |
| No. of all resected LNs (per LN)                    |            |                 | 1.01 (0.86–1.18)                   | 0.931        |
| No. of TAD LNs (per LN)                             |            |                 | 0.99 (0.69–1.42)                   | 0.952        |
| Pathological tumor status after NST                 |            |                 |                                    |              |
| ypT0                                                | 145 (72.9) | 8 (5.5)         | 1 [Reference]                      |              |
| ypT1–4                                              | 50 (25.1)  | 6 (12.0)        | 3.06 (0.78–12.0)                   | 0.110        |
| ypTx                                                | 4 (2.0)    | 1 (25.0)        | -                                  |              |
| Radiotherapy                                        |            |                 |                                    |              |
| No                                                  | 12 (6.0)   | 2 (16.7)        | 1 [Reference]                      |              |
| Yes                                                 | 180 (90.5) | 12 (6.7)        | 0.30 (0.05–1.74)                   | 0.178        |
| Unknown                                             | 7 (3.5)    | 1 (14.3)        | -                                  |              |
| Post-neoadjuvant Chemotherapy                       |            |                 |                                    |              |
| No                                                  | 176 (88.4) | 14 (8.0)        | 1 [Reference]                      |              |
| Yes                                                 | 17 (8.5)   | 0               | -                                  |              |
| Unknown                                             | 6 (3.0)    | 1 (16.7)        | -                                  |              |

Abbreviations: ALND, axillary lymph node dissection; CI, confidence interval; *ERBB2*, human epidermal growth factor receptor 2; HR, hazard ratio; HR+, hormone receptor positive; HR–, hormone receptor negative; LN, lymph node; NST, neoadjuvant systemic therapy; TAD, targeted axillary dissection; T, tumor; ycN0/+, clinically node negative/positive after NST; ypN0/+, pathologically node negative/positive after NST.

<sup>a</sup> The number of positive lymph nodes had a high intercorrelation with ypN and was therefore excluded from the model. Likewise, endocrine and antibody therapy had a high correlation with tumor receptor subtype and were not included in the model. Statistically significant *P* values are indicated in bold.

**eTable 5.** Multivariate Cox Regression Analysis for Distant Disease-Free Survival

|                                                  | Total      | Events    | Multivariate Analysis <sup>a</sup> |                  |
|--------------------------------------------------|------------|-----------|------------------------------------|------------------|
|                                                  |            |           | HR (95% CI)                        | P                |
| Number                                           | 199        | 24 (12.1) |                                    |                  |
| Axillary surgery                                 |            |           |                                    |                  |
| TAD + ALND                                       | 80 (40.2)  | 15 (18.8) | 1 [Reference]                      |                  |
| TAD                                              | 119 (59.8) | 9 (7.6)   | 0.25 (0.05–1.15)                   | 0.076            |
| Age per Year                                     |            |           | 1.04 (0.99–1.08)                   | 0.080            |
| Tumor receptor subtype                           |            |           |                                    |                  |
| HR+/ <i>ERBB2</i> +                              | 39 (19.6)  | 3 (7.7)   | 1 [Reference]                      |                  |
| HR+/ <i>ERBB2</i> –                              | 87 (43.7)  | 13 (14.9) | 0.16 (0.03–0.82)                   | <b>0.028</b>     |
| HR–/ <i>ERBB2</i> +                              | 29 (14.6)  | 2 (6.9)   | 0.40 (0.05–3.29)                   | 0.395            |
| HR–/ <i>ERBB2</i> –                              | 44 (22.1)  | 6 (13.6)  | 0.58 (0.21–2.80)                   | 0.498            |
| Clinical tumor size at diagnosis (per mm)        |            |           | 1.03 (1.00–1.06)                   | <b>0.024</b>     |
| No. of suspicious LNs on ultrasound at diagnosis |            |           |                                    |                  |
| 1                                                | 114 (57.3) | 10 (8.8)  | 1 [Reference]                      |                  |
| 2                                                | 47 (23.6)  | 8 (17.0)  | 2.17 (0.75–6.27)                   | 0.152            |
| ≥ 3                                              | 38 (19.1)  | 6 (15.8)  | 4.63 (1.35–15.8)                   | <b>0.015</b>     |
| Clinical nodal status after NST                  |            |           |                                    |                  |
| ycN0                                             | 152 (76.4) | 15 (9.9)  | 1 [Reference]                      |                  |
| ycN+                                             | 47 (23.6)  | 9 (19.1)  | 2.31 (0.82–6.53)                   | 0.114            |
| Pathological nodal status after NST              |            |           |                                    |                  |
| ypN0                                             | 126 (63.3) | 8 (6.3)   | 1 [Reference]                      |                  |
| ≥ ypN1                                           | 73 (36.7)  | 16 (21.9) | 3.69 (0.94–14.5)                   | 0.062            |
| No. of all resected LNs (per LN)                 |            |           | 0.93 (0.84–1.04)                   | 0.212            |
| No. of TAD LNs (per LN)                          |            |           | 0.75 (0.53–1.06)                   | 0.100            |
| Pathological tumor status after NST              |            |           |                                    |                  |
| ypT0                                             | 145 (72.9) | 9 (6.2)   | 1 [Reference]                      |                  |
| ypT1–4                                           | 50 (25.1)  | 15 (30.0) | 8.23 (2.71–25.0)                   | <b>&lt;0.001</b> |
| ypTx                                             | 4 (2.0)    | 0         | -                                  |                  |
| Radiotherapy                                     |            |           |                                    |                  |
| No                                               | 12 (6.0)   | 2 (16.7)  | 1 [Reference]                      |                  |
| Yes                                              | 180 (90.5) | 21 (11.7) | 0.19 (0.03–1.02)                   | 0.053            |
| Unknown                                          | 7 (3.5)    | 1 (14.3)  | 0.17 (0.01–3.91)                   | 0.267            |
| Post-neoadjuvant Chemotherapy                    |            |           |                                    |                  |
| No                                               | 176 (88.4) | 23 (13.1) | 1 [Reference]                      |                  |
| Yes                                              | 17 (8.5)   | 1 (5.9)   | 0.38 (0.05–3.28)                   | 0.381            |
| Unknown                                          | 6 (3.0)    | 0         | -                                  |                  |

Abbreviations: ALND, axillary lymph node dissection; CI, confidence interval; *ERBB2*, human epidermal growth factor receptor 2; HR, hazard ratio; HR+, hormone receptor positive; HR–, hormone receptor negative; LN, lymph node; NST, neoadjuvant systemic therapy; TAD, targeted axillary dissection; T, tumor; ycN0/+, clinically node negative/positive after NST; ypN0/+, pathologically node negative/positive after NST.

<sup>a</sup> The number of positive lymph nodes had a high intercorrelation with ypN and was therefore excluded from the model. Likewise, endocrine and antibody therapy had a high correlation with tumor receptor subtype and were not included in the model. Statistically significant *P* values are indicated in bold.

**eTable 6.** Multivariate Cox Regression Analysis for Breast Cancer-Specific Survival

|                                                     | Total      | Events<br>N (%) | Multivariate Analysis <sup>a</sup> |              |
|-----------------------------------------------------|------------|-----------------|------------------------------------|--------------|
|                                                     |            |                 | HR (95% CI)                        | P            |
| Number                                              | 199        | 11 (5.5)        |                                    |              |
| Axillary surgery                                    |            |                 |                                    |              |
| TAD + ALND                                          | 80 (40.2)  | 6 (7.5)         | 1 [Reference]                      |              |
| TAD                                                 | 119 (59.8) | 5 (4.2)         | 1.05 (0.09–11.7)                   | 0.968        |
| Age per Year                                        |            |                 | 1.09 (1.02–1.17)                   | <b>0.017</b> |
| Tumor receptor subtype                              |            |                 |                                    |              |
| HR+/ <i>ERBB2</i> +                                 | 39 (19.6)  | 2 (5.1)         | 1 [Reference]                      |              |
| HR+/ <i>ERBB2</i> –                                 | 87 (43.7)  | 5 (5.7)         | 0.31 (0.04–2.13)                   | 0.231        |
| HR–/ <i>ERBB2</i> +                                 | 29 (14.6)  | 0               | -                                  |              |
| HR–/ <i>ERBB2</i> –                                 | 44 (22.1)  | 4 (9.1)         | 1.75 (0.27–11.3)                   | 0.557        |
| Clinical tumor size at diagnosis<br>(per mm)        |            |                 | 1.00 (0.94–1.07)                   | 0.932        |
| No. of suspicious LNs on<br>ultrasound at diagnosis |            |                 |                                    |              |
| 1                                                   | 114 (57.3) | 7 (6.1)         | 1 [Reference]                      |              |
| 2                                                   | 47 (23.6)  | 3 (6.4)         | 1.78 (0.37–8.57)                   | 0.573        |
| ≥ 3                                                 | 38 (19.1)  | 2 (2.6)         | 0.38 (0.20–7.71)                   | 0.529        |
| Clinical nodal status after NST                     |            |                 |                                    |              |
| ycN0                                                | 152 (76.4) | 6 (3.9)         | 1 [Reference]                      |              |
| ycN+                                                | 47 (23.6)  | 5 (10.6)        | 2.41 (0.56–10.4)                   | 0.240        |
| Pathological nodal status after NST                 |            |                 |                                    |              |
| ypN0                                                | 126 (63.3) | 3 (2.4)         | 1 [Reference]                      |              |
| ≥ ypN1                                              | 73 (36.7)  | 8 (11.0)        | 10.1 (1.36–74.6)                   | <b>0.024</b> |
| No. of all resected LNs (per LN)                    |            |                 | 1.02 (0.85–1.22)                   | 0.807        |
| No. of TAD LNs (per LN)                             |            |                 | 0.71 (0.39–1.30)                   | 0.269        |
| Pathological tumor status after NST                 |            |                 |                                    |              |
| ypT0                                                | 145 (72.9) | 5 (3.4)         | 1 [Reference]                      |              |
| ypT1-4                                              | 50 (25.1)  | 6 (12.0)        | 3.94 (0.86–18.1)                   | 0.078        |
| ypTx                                                | 4 (2.0)    | 0               | -                                  |              |
| Radiotherapy                                        |            |                 |                                    |              |
| No                                                  | 12 (6.0)   | 2 (16.7)        | 1 [Reference]                      |              |
| Yes                                                 | 180 (90.5) | 9 (5.0)         | 0.10 (0.01–0.79)                   | <b>0.030</b> |
| Unknown                                             | 7 (3.5)    | 0               | -                                  |              |
| Post-neoadjuvant Chemotherapy                       |            |                 |                                    |              |
| No                                                  | 176 (88.4) | 11 (6.3)        | 1 [Reference]                      |              |
| Yes                                                 | 17 (8.5)   | 0               | -                                  |              |
| Unknown                                             | 6 (3.0)    | 0               | -                                  |              |

Abbreviations: ALND, axillary lymph node dissection; CI, confidence interval; *ERBB2*, human epidermal growth factor receptor 2; HR, hazard ratio; HR+, hormone receptor positive; HR–, hormone receptor negative; LN, lymph node; NST, neoadjuvant systemic therapy; TAD, targeted axillary dissection; T, tumor; ycN0/+, clinically node negative/positive after NST; ypN0/+, pathologically node negative/positive after NST.

<sup>a</sup> The number of positive lymph nodes had a high intercorrelation with ypN and was therefore excluded from the model. Likewise, endocrine and antibody therapy had a high correlation with tumor receptor subtype and were not included in the model. Statistically significant *P* values are indicated in bold.

**eFigure.** Kaplan-Meier Curves for Distant Disease-Free Survival, Breast Cancer–Specific Survival, and Locoregional Recurrence

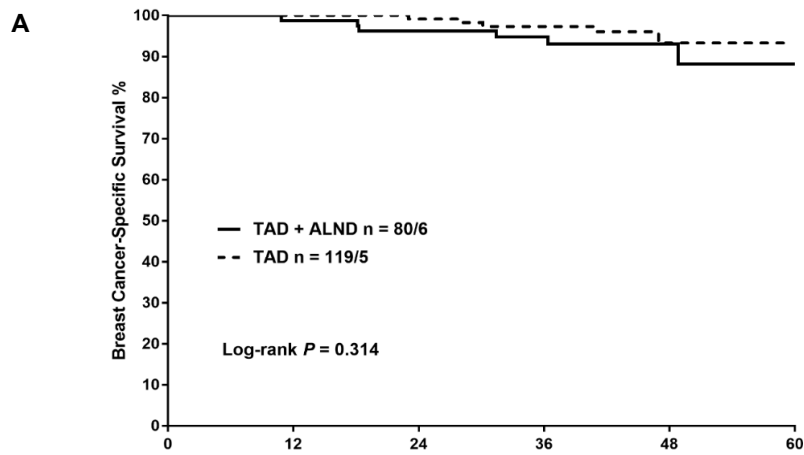

No. at risk:

|            | 0   | 12  | 24  | 36  | 48 | 60 |
|------------|-----|-----|-----|-----|----|----|
| TAD        | 119 | 118 | 114 | 104 | 31 |    |
| TAD + ALND | 80  | 79  | 74  | 59  | 24 |    |

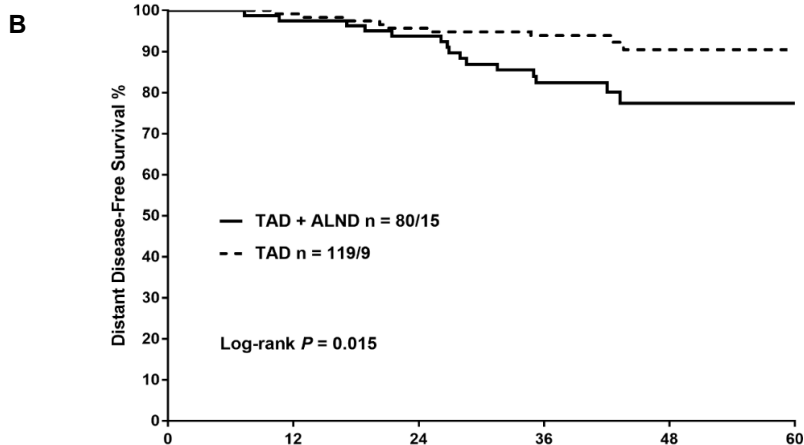

No. at risk:

|            | 0   | 12  | 24  | 36 | 48 | 60 |
|------------|-----|-----|-----|----|----|----|
| TAD        | 119 | 117 | 109 | 99 | 29 |    |
| TAD + ALND | 80  | 78  | 72  | 53 | 22 |    |

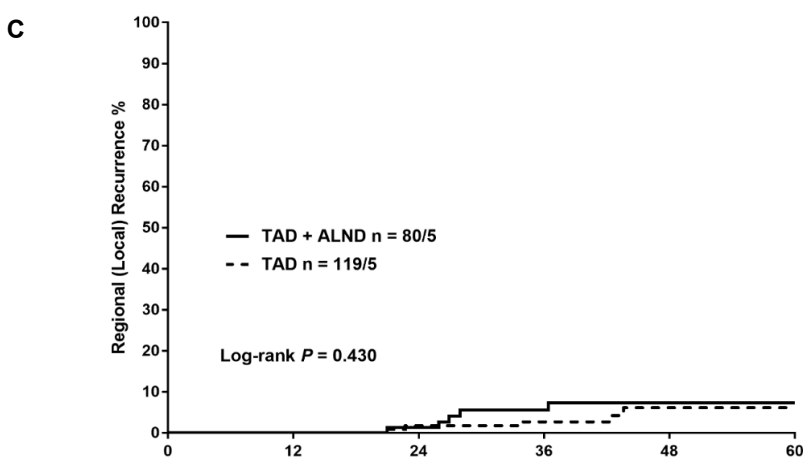

No. at risk:

|            | 0   | 12  | 24  | 36  | 48 | 60 |
|------------|-----|-----|-----|-----|----|----|
| TAD        | 119 | 118 | 113 | 102 | 28 |    |
| TAD + ALND | 80  | 79  | 73  | 57  | 24 |    |



Kaplan-Meier curves for (A) breast-cancer specific survival, (B) distant disease-free survival as well as cumulative incidence of (C) locoregional recurrence for 80 patients who underwent targeted axillary dissection (TAD) with axillary lymph node dissection (ALND) versus 119 patients who underwent TAD alone. Fifteen patients in the TAD with ALND group and six patients in the TAD alone group suffered from distant metastases; six and five patients, respectively, died of breast cancer. All 10 patients, five in each group, with regional recurrence suffered from local recurrence as well.
