# Supplementary material
Source: PubMed Central journal article supplement (PMC10248815)
Supplement: jamasurg-e231772-s002.pdf [file jamasurg-e231772-s002.pdf]

## Data Sharing Statement

Kuemmel. Safety of Targeted Axillary Dissection After Neoadjuvant Therapy in Patients With Node-Positive Breast Cancer. *JAMA Surg.* Published June 07, 2023.

doi:10.1001/jamasurg.2023.1772

### Data

**Data available:** No

### Additional Information

**Explanation for why data not available:** Patients included in the SenTa study did not provide consent that individual patient data are made available to others apart from the investigator team.
